# Supplementary material for: Maternal depression is associated with injuries in children aged 2–4 years: the Pelotas 2004 Birth Cohort
Source: PubMed Central journal article supplement (PMC6582736; doi:10.1136/injuryprev-2017-042641), 2018-02-26
Supplement: injuryprev-2017-042641supp001.pdf [file injuryprev-2017-042641supp001.pdf]

**Table 2A:** Incidence of falls with respective 95% confidence interval (95% CI), according to the number of maternal depression episodes\* (n = 3,533).

| Maternal depression | Incidence of falls<br>(95%CI) |                     |                     |
|---------------------|-------------------------------|---------------------|---------------------|
|                     | Boys                          | Girls               | Total               |
| Never depressed     | 7.08<br>(6.60-7.59)           | 5.63<br>(5.16-6.15) | 6.39<br>(6.05-6.76) |
| Depressed 1-2 times | 7.09<br>(6.32-7.95)           | 7.45<br>(6.67-8.32) | 7.27<br>(6.72-7.87) |
| Always depressed    | 8.14<br>(7.13-9.30)           | 7.55<br>(6.48-8.79) | 7.86<br>(7.11-8.69) |

\* Edinburgh Postnatal Depression Scale (EPDS  $\geq$  13)

**Table 2B:** Incidence of cuts with respective 95% confidence interval (95% CI), according to the number of maternal depression episodes\* (n = 3,533).

| Maternal depression | Incidence of cuts<br>(95%CI) |                     |                     |
|---------------------|------------------------------|---------------------|---------------------|
|                     | Boys                         | Girls               | Total               |
| Never depressed     | 0.51<br>(0.45-0.59)          | 0.42<br>(0.36-0.48) | 0.47<br>(0.43-0.52) |
| Depressed 1-2 times | 0.64<br>(0.54-0.76)          | 0.63<br>(0.53-0.74) | 0.63<br>(0.56-0.71) |
| Always depressed    | 1.06<br>(0.87-1.28)          | 0.59<br>(0.45-0.76) | 0.84<br>(0.71-0.98) |

\* Edinburgh Postnatal Depression Scale (EPDS  $\geq$  13)

**Table 2C:** Incidence of burns with respective 95% confidence interval (95% CI), according to the number of maternal depression episodes\* (n = 3,533).

| Maternal depression | Incidence of burns<br>(95%CI) |                     |                     |
|---------------------|-------------------------------|---------------------|---------------------|
|                     | Boys                          | Girls               | Total               |
| Never depressed     | 0.20<br>(0.17-0.22)           | 0.17<br>(0.14-0.20) | 0.18<br>(0.17-0.20) |
| Depressed 1-2 times | 0.23<br>(0.18-0.28)           | 0.19<br>(0.15-0.24) | 0.21<br>(0.18-0.24) |
| Always depressed    | 0.25<br>(0.19-0.34)           | 0.22<br>(0.16-0.29) | 0.24<br>(0.19-0.29) |

\* Edinburgh Postnatal Depression Scale (EPDS  $\geq$  13)

**Table 3A:** Incidence rate ratios of falls among children aged 24-48 months, according to exposure to maternal depression during pregnancy and at 12 and 24 months postpartum (EPDS  $\geq$  13). Pelotas 2004 Birth Cohort, RS, Brazil (n = 3,289)

| Maternal depression  | Falls<br>(95% CI)   |                                 |                     |                                  |                     |                                  |
|----------------------|---------------------|---------------------------------|---------------------|----------------------------------|---------------------|----------------------------------|
|                      | Boys                |                                 | Girls               |                                  | Total               |                                  |
|                      | Crude<br>p=0.09     | Adjusted <sup>a</sup><br>p=0.17 | Crude<br>p<0.001    | Adjusted <sup>b</sup><br>p<0.001 | Crude<br>p<0.001    | Adjusted <sup>c</sup><br>p<0.001 |
| Never depressed      | 1.0                 | 1.0                             | 1.0                 | 1.0                              | 1.0                 | 1.0                              |
| Depression 1-2 times | 1.00<br>(0.88-1.15) | 1.02<br>(0.88-1.16)             | 1.32<br>(1.15-1.52) | 1.32<br>(1.14-1.52)              | 1.14<br>(1.03-1.25) | 1.16<br>(1.05-1.28)              |
| Always depressed     | 1.15<br>(0.99-1.34) | 1.12<br>(0.96-1.30)             | 1.34<br>(1.12-1.60) | 1.36<br>(1.14-1.62)              | 1.23<br>(1.10-1.38) | 1.22<br>(1.08-1.38)              |

**Model adjusted for:**

**a:** Mother's age, live with a partner, maternal smoking and child's skin color; **b:** Brazilian National Economic Index, mother's education level, mother's age, planned pregnancy, type of family and birth weight; **c:** Brazilian National Economic Index, mother's education level, mother's age, maternal smoking, planned pregnancy, child's skin color and birth weight;

**Table 3B:** Incidence rate ratios of cuts among children aged 24-48 months, according to exposure to maternal depression during pregnancy and at 12 and 24 months postpartum (EPDS  $\geq$  13). Pelotas 2004 Birth Cohort, RS, Brazil (n = 3,496)

| Maternal depression         | Cuts<br>(95% CI) |                       |             |                       |             |                       |
|-----------------------------|------------------|-----------------------|-------------|-----------------------|-------------|-----------------------|
|                             | Boys             |                       | Girls       |                       | Total       |                       |
|                             | Crude            | Adjusted <sup>a</sup> | Crude       | Adjusted <sup>b</sup> | Crude       | Adjusted <sup>c</sup> |
|                             | p<0.001          | p<0.001               | p=0.04      | p=0.12                | p<0.001     | p<0.001               |
| <b>Never depressed</b>      | 1.0              | 1.0                   | 1.0         | 1.0                   | 1.0         | 1.0                   |
| <b>Depression 1-2 times</b> | 1.24             | 1.11                  | 1.50        | 1.34                  | 1.35        | 1.21                  |
|                             | (1.00-1.55)      | (0.89-1.39)           | (1.20-1.86) | (1.08-1.68)           | (1.16-1.58) | (1.03-1.42)           |
| <b>Always depressed</b>     | 2.05             | 1.63                  | 1.41        | 1.20                  | 1.78        | 1.46                  |
|                             | (1.63-2.59)      | (1.28-2.08)           | (1.05-1.89) | (0.90-1.61)           | (1.48-2.14) | (1.21-1.77)           |

**Model adjusted for:**

**a:** Brazilian National Economic Index, mother's education level, mother's age, maternal smoking, alcohol consumption during pregnancy and number of siblings in the household; **b:** Brazilian National Economic Index, mother's education level, mother's age, planned pregnancy, number of siblings in the household and type of family; **c:** Brazilian National Economic Index, mother's education level, mother's age, maternal smoking, alcohol consumption during pregnancy, planned pregnancy and number of siblings in the household;

**Table 3C:** Incidence rate ratios of burns among children aged 24-48 months, according to exposure to maternal depression during pregnancy and at 12 and 24 months postpartum (EPDS  $\geq$  13). Pelotas 2004 Birth Cohort, RS, Brazil (n = 3,291)

| Maternal depression         | Burns<br>(95% CI) |                       |             |                       |             |                       |
|-----------------------------|-------------------|-----------------------|-------------|-----------------------|-------------|-----------------------|
|                             | Boys              |                       | Girls       |                       | Total       |                       |
|                             | Crude             | Adjusted <sup>a</sup> | Crude       | Adjusted <sup>b</sup> | Crude       | Adjusted <sup>c</sup> |
|                             | p=0.08            | p=0.16                | p=0.10      | p=0.18                | p=0.02      | p=0.02                |
| <b>Never depressed</b>      | 1.0               | 1.0                   | 1.0         | 1.0                   | 1.0         | 1.0                   |
| <b>Depression 1-2 times</b> | 1.16              | 1.12                  | 1.11        | 1.05                  | 1.13        | 1.13                  |
|                             | (0.90-1.51)       | (0.86-1.45)           | (0.84-1.47) | (0.79-1.41)           | (0.93-1.37) | (0.92-1.38)           |
| <b>Always depressed</b>     | 1.29              | 1.25                  | 1.31        | 1.26                  | 1.30        | 1.32                  |
|                             | (0.95-1.77)       | (0.90-1.72)           | (0.94-1.81) | (0.90-1.77)           | (1.04-1.63) | (1.04-1.68)           |

**Model adjusted for:**

**a:** Live with a partner, maternal smoking and alcohol consumption during pregnancy; **b:** Mother's education level, mother's age and alcohol consumption during pregnancy; **c:** Mother's education level, mother's age, alcohol consumption during pregnancy and child's skin color;
